# Supplementary material
Source: PubMed Central journal article supplement (PMC9017137)
Supplement: mmc1.pdf [file mmc1.pdf]

**Cell Reports Methods, Volume 1**

**Supplemental information**

**Genetically encoded biosensors for evaluating  
NAD<sup>+</sup>/NADH ratio in cytosolic  
and mitochondrial compartments**

**Qingxun Hu, Dan Wu, Matthew Walker, Pei Wang, Rong Tian, and Wang Wang**

## **Supplemental Information**

**Inventory of Supplemental information:**

### **Supplemental Figure Legend**

**(1) Figure S1. Related to Figure 1.**

**(2) Figure S2. Related to Figure 4.**

**(3) Figure S3. Related to Figure 5.**

## Supplemental Figure Legend

**Figure S1. Characterization of mt-SoNar in live cells, Related to Figure 1.** **A**, Representative images of mt-SoNar or mt-cpYFP expression in H9C2 cells after adenovirus mediated gene expression. **B**, Representative images of H9C2 cardiomyoblasts loaded with TMRE (20 nM) and after incubation with PBS or 0.3% digitonin. The quick diffusion of TMRE signal upon the addition of 0.3% digitonin indicates the permeabilization of mitochondrial inner membrane. **C-D**, The effect of mt-SoNar on HEK293 cell viability (**C**) or proliferation (**D**). N=3.

**Figure S2. Effects of pathological stress on NAD<sup>+</sup>/NADH ratios, mitochondrial membrane potential and cell death, Related to Figure 4.** **A-B**, AcAc/ $\beta$ -OHB ratio (**A**) and pyruvate/lactate ratio (**B**) by biochemical assays before and after phenylephrine (PE, 4 hr) incubation. N=3 rats. \*:  $P < 0.05$  versus Control. **C**, Membrane potential in response to acute addition of caffeine (10 mM). N=3 rats. **D**, Effects of PE (10  $\mu$ M for 15 min or 4 hr) on cell death. N=3 rats.

**Figure S3. Effects of nicotinamide riboside (NR) on intracellular NAD<sup>+</sup>/NADH ratios, Related to Figure 5.** Total intracellular NAD<sup>+</sup> level, NADH level and NAD<sup>+</sup>/NADH ratio (**A**), or mitochondrial (**B**) or cytosolic (**C**) NAD<sup>+</sup>/NADH ratio after NR (1 mM) incubation for 0, 4, 24 or 72 hr. N=5-9 rats. \*:  $P < 0.05$  versus Control (0 hr, value is set as 1.0).

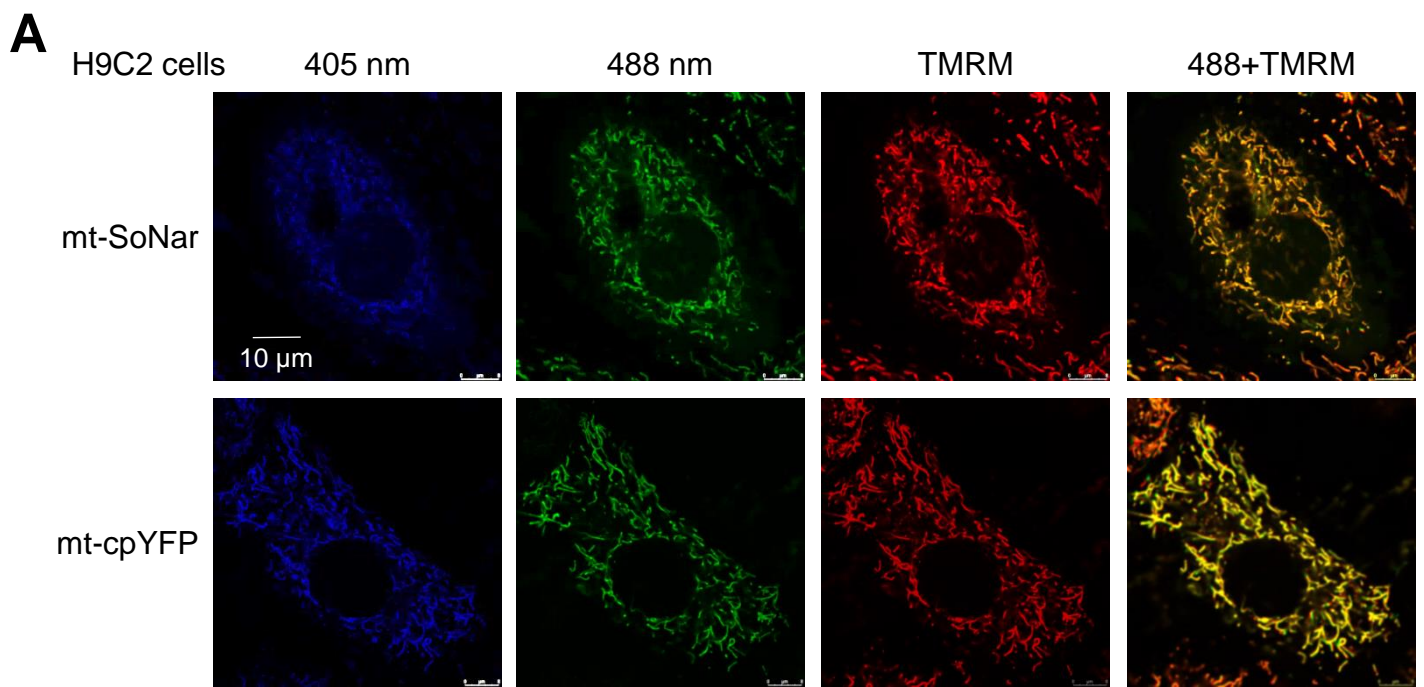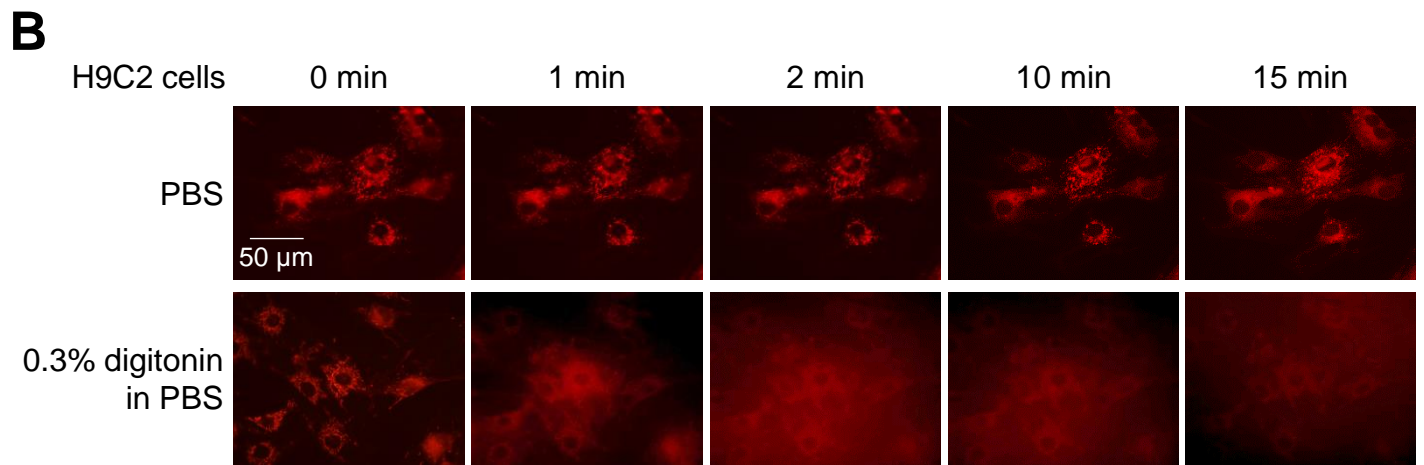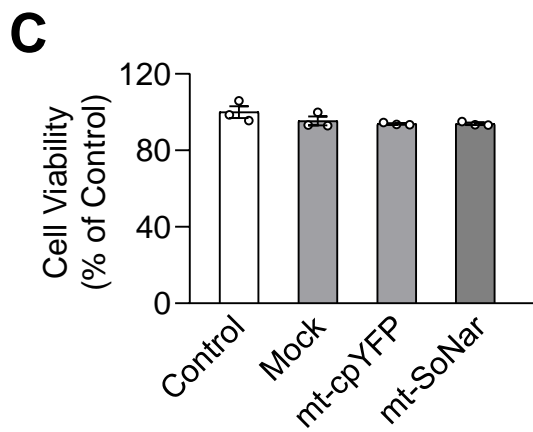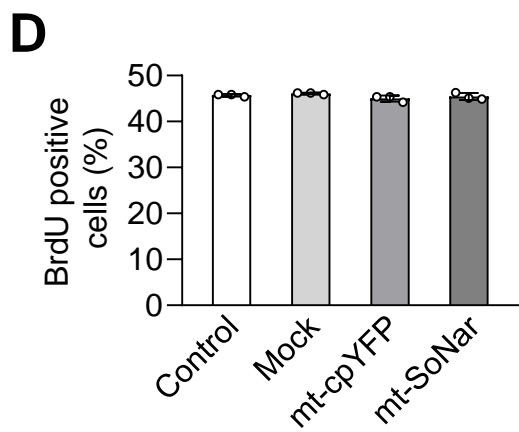

Figure S1

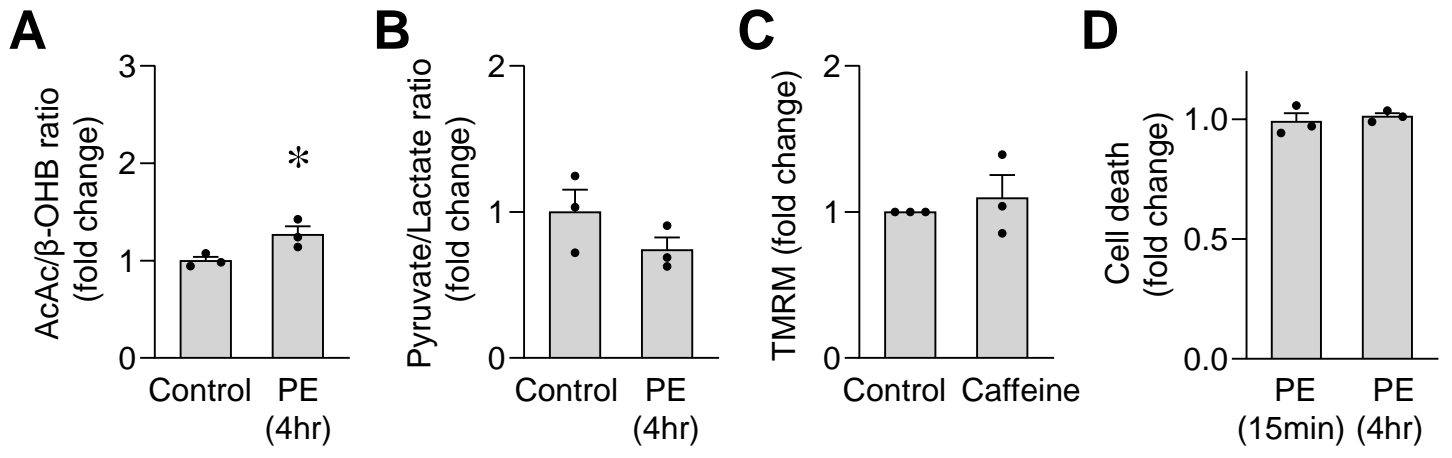

Figure S2

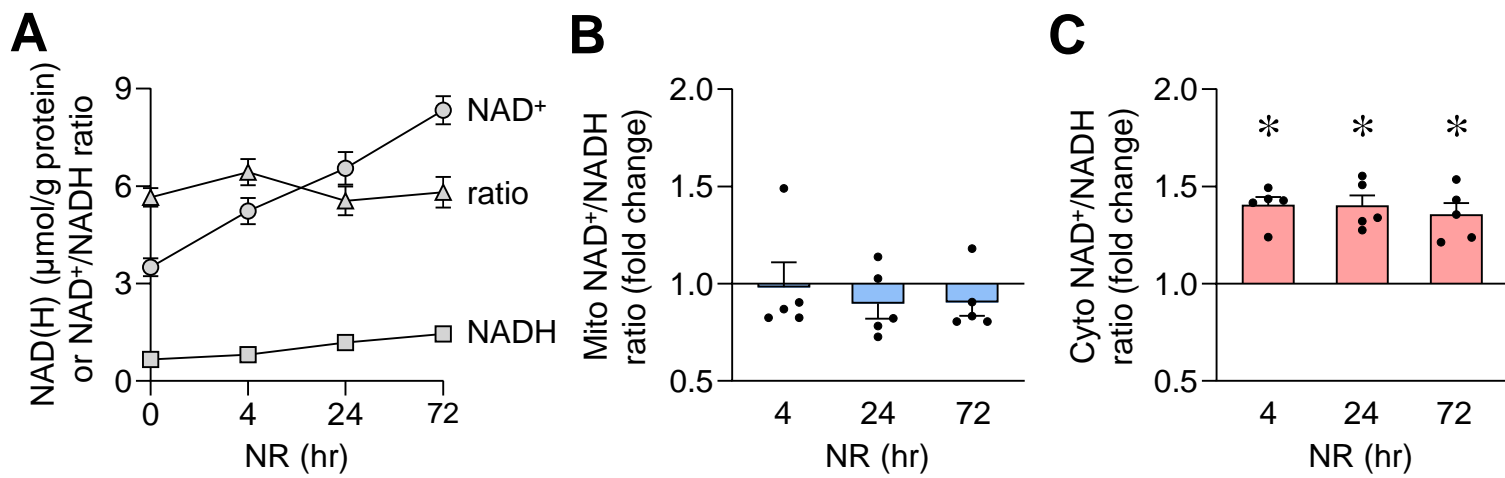

Figure S3
